# Supplementary material for: A poly(vinylidene fluoride)-graft-poly(dopamine acrylamide) copolymer for surface functionalizable membranes
Source: Royal Society of Chemistry journal article supplement (doi:10.1039/c3ra42782j), 2013-01-01
Supplement: c3ra42782j.pdf [file c3ra42782j.pdf]

***Electronic Supplementary Information***

**Poly(vinylidene fluoride)-*graft*-Poly(dopamine acrylamide) Copolymer  
For Surface Functionalizable Membranes**

Li Qun Xu<sup>1</sup>, Jiu Cun Chen<sup>1</sup>, Rong Wang<sup>1</sup>, Koon-Gee Neoh<sup>1</sup>, En-Tang Kang<sup>1\*</sup>, Guo Dong Fu<sup>2\*</sup>

<sup>1</sup> Department of Chemical & Biomolecular Engineering  
National University of Singapore  
Kent Ridge, Singapore 117576

<sup>2</sup> School of Chemistry and Chemical Engineering  
Southeast University  
Jiangning District, Nanjing, Jiangsu Province, P.R. China 211189

\* To whom correspondence should be addressed:  
E-mail: cheket@nus.edu.sg (ETK); fu7352@seu.edu.cn (GDF)

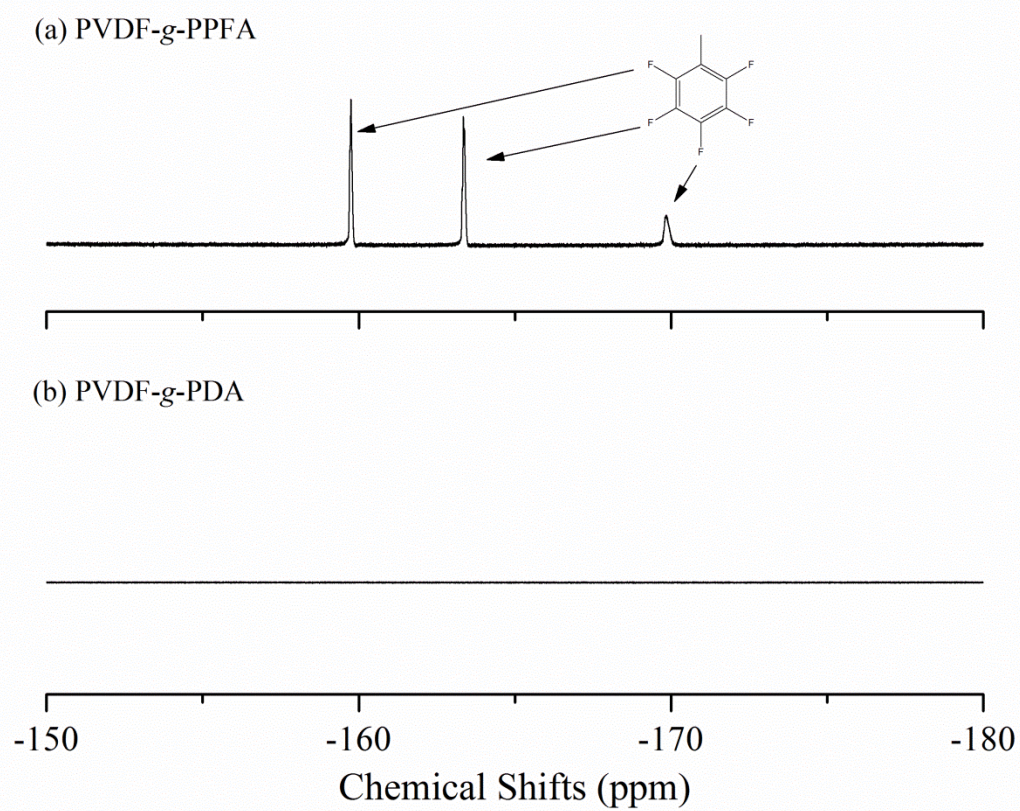

**Figure S1:**  $^{19}\text{F}$  NMR spectra of (a) PVDF-*g*-PPFA and (b) PVDF-*g*-PDA copolymers.

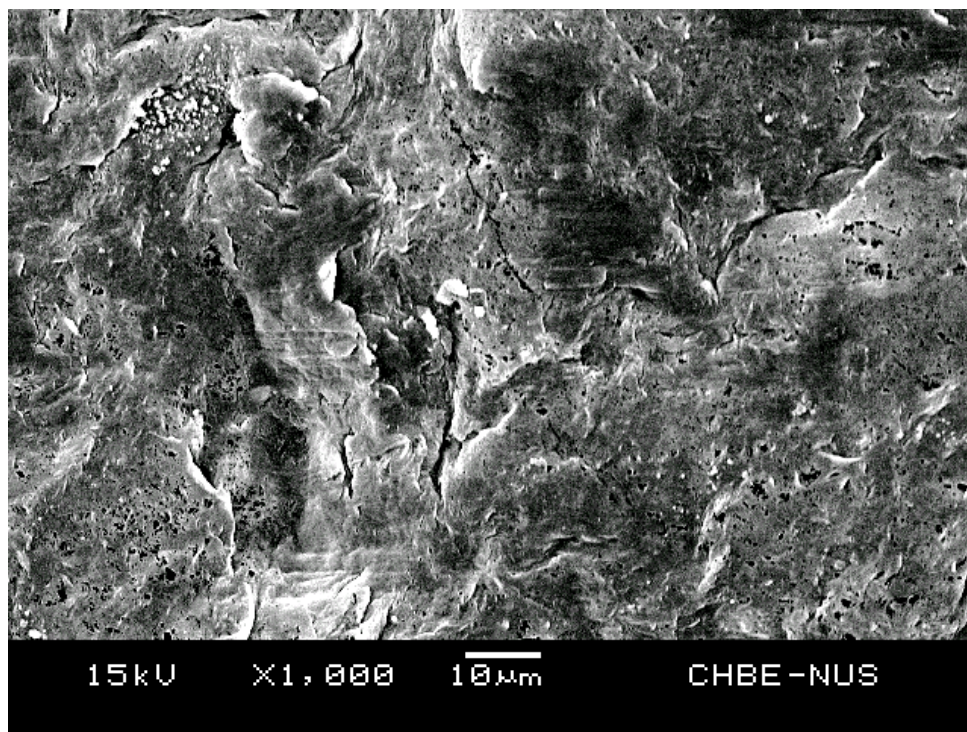

**Figure S2:** SEM image of the pristine PVDF membrane.

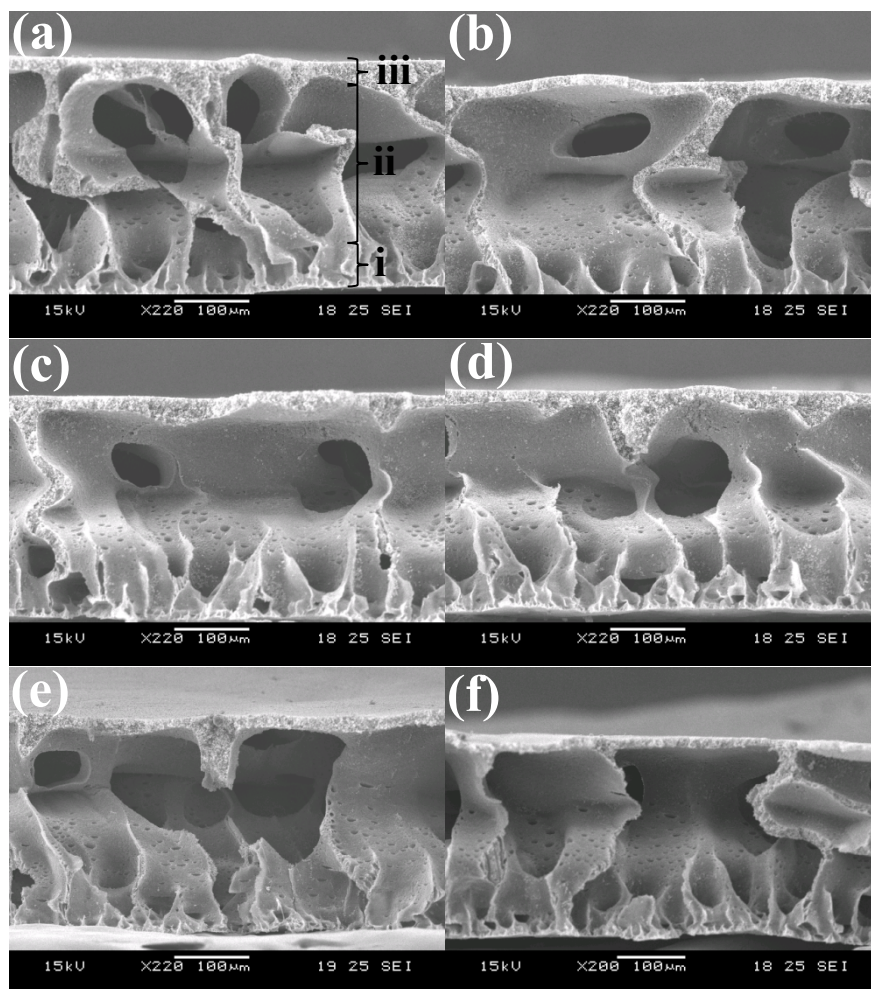

**Fig. S3.** SEM images of the cross-section of the (a) PVDF-*g*-PDA, (b) PVDF-*g*-PDA/AgNPs, (c) PVDF-*g*-PDA/AuNPs, (d) PVDF-*g*-PDA/PEG, (e) PVDF-*g*-PDA/PNIPAM and (f) PVDF-*g*-PDA/HPG MF membranes.

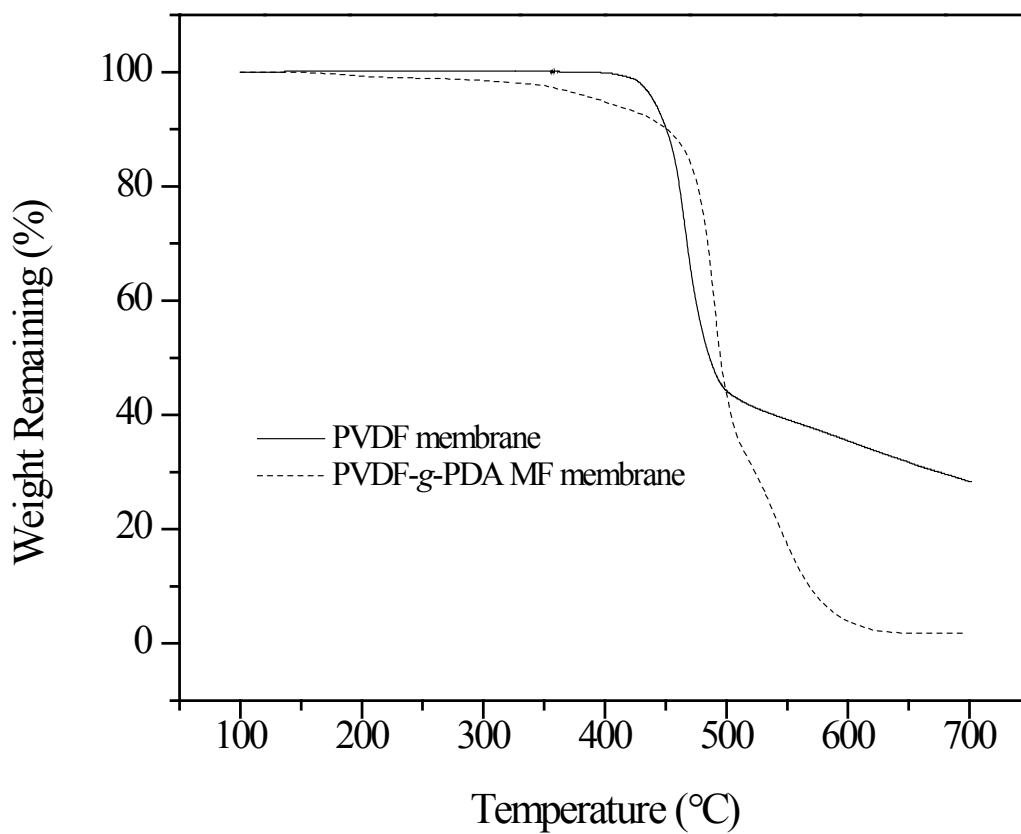

**Fig. S4.** Thermogravimetric analysis (TGA) curves of the (a) PVDF and (b) PVDF-g-PDA MF membranes at a heating rate of 15 °C/min in air.

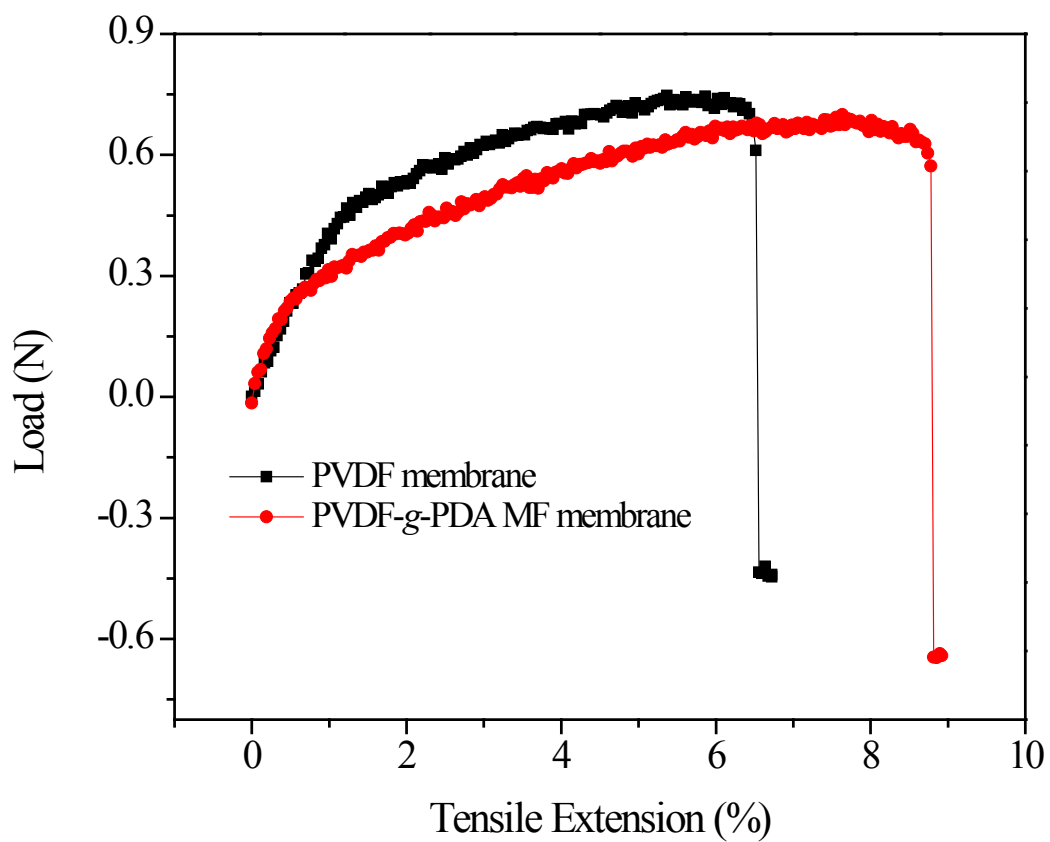

**Fig. S5.** Stress-strain relationship for the PVDF and PVDF-g-PDA MF membranes.

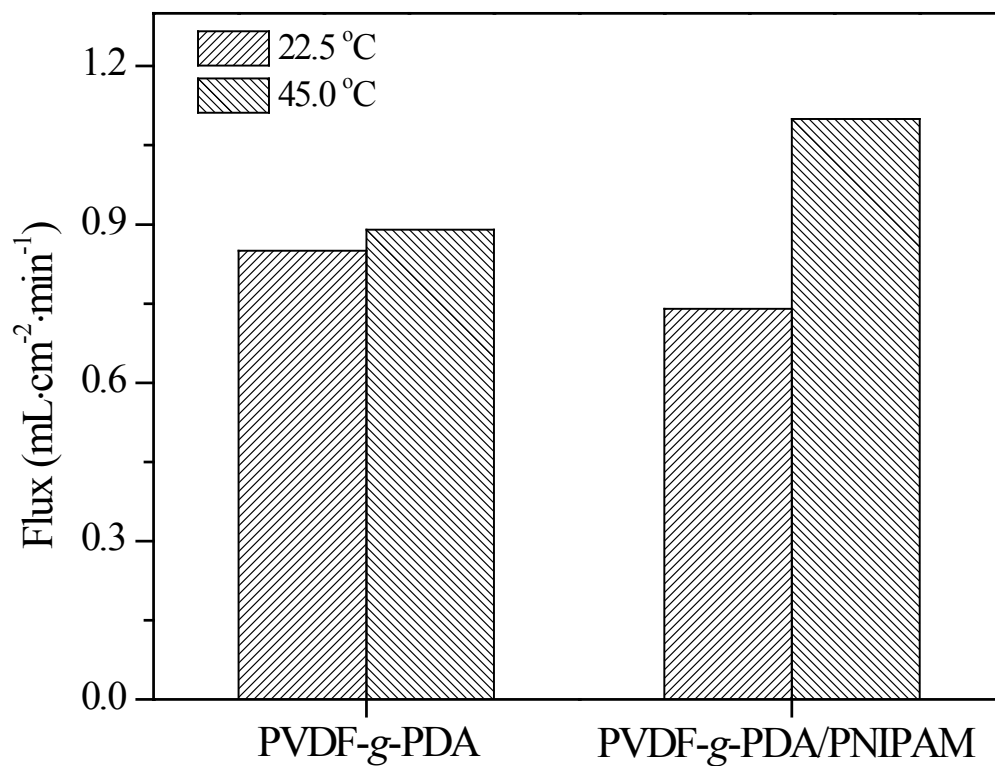

Fig. S6. Temperature-dependent water permeability through the PVDF-*g*-PDA and PVDF-*g*-PDA/PNIPAM MF membranes under an imposed pressure of 0.1 kg/cm<sup>2</sup> in a microfiltration cell (Toyo Roshi UHP-25 Japan).

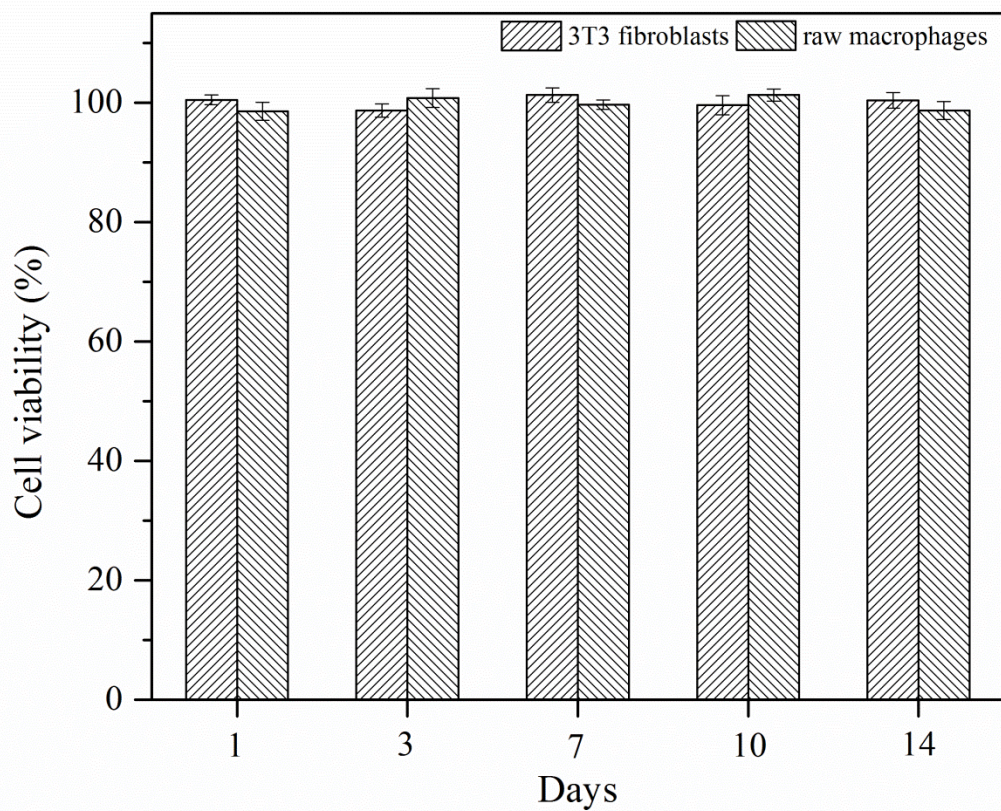

**Figure S7.** Relative cell viability of 3T3 fibroblasts and raw macrophages after 72 h of culturing in DMEM medium pretreated with the PVDF-g-PDA MF membrane for 1, 3, 7, 10 and 14 days
